# Supplementary material
Source: publisher figshare collection journal article supplement (https://springernature.figshare.com/ndownloader/files/24128771)

# Cyclodextrinase from *Thermococcus* sp expressed in *Bacillus subtilis* and its application in the preparation of maltoheptaose

**Figure S1 Protein sequence analysis of cyclodextrins from various sources**

CDase: Cyclomaltodextrinase; NPase: Neopullulanase; MAase: Maltogenic amylase; Square brackets: Gene accession number

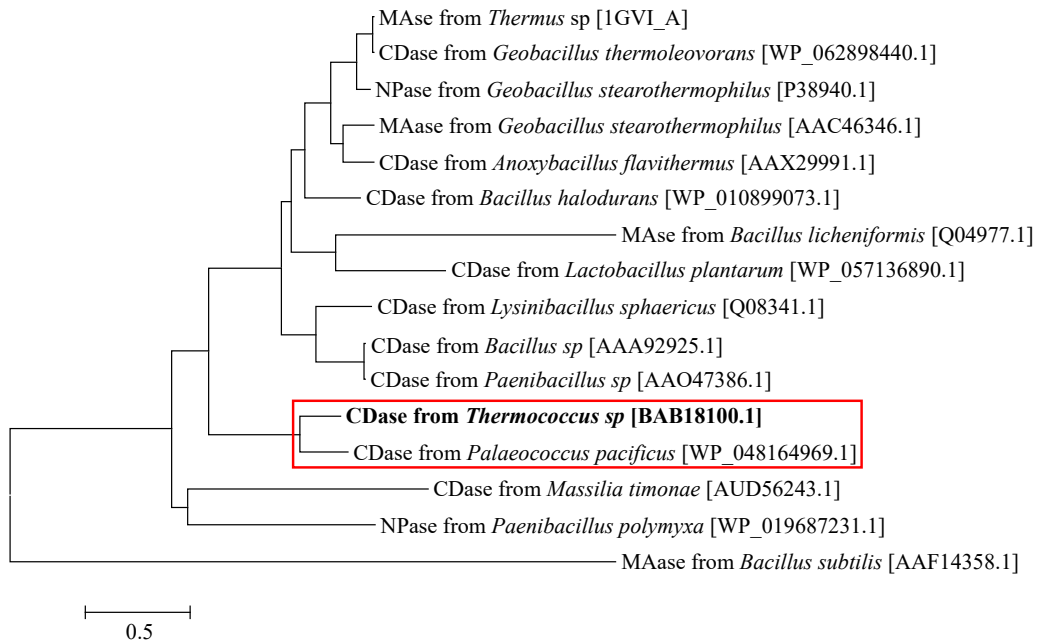

Supplement: Supplementary file [file 24128771]
